# Supplementary material for: Stability of Mycotoxins in Individual Stock and Multi-Analyte Standard Solutions
Source: PubMed Central journal article supplement (PMC7076964; doi:10.3390/toxins12020094), 2020-01-30
Supplement: toxins-12-00094-s001.pdf [file toxins-12-00094-s001.pdf]

# Supplementary Materials: Stability of Mycotoxins in Individual Stock and Multi-Analyte Standard Solutions

Mariya Kiseleva, Zakhar Chalyy, Irina Sedova and Ilya Aksenov

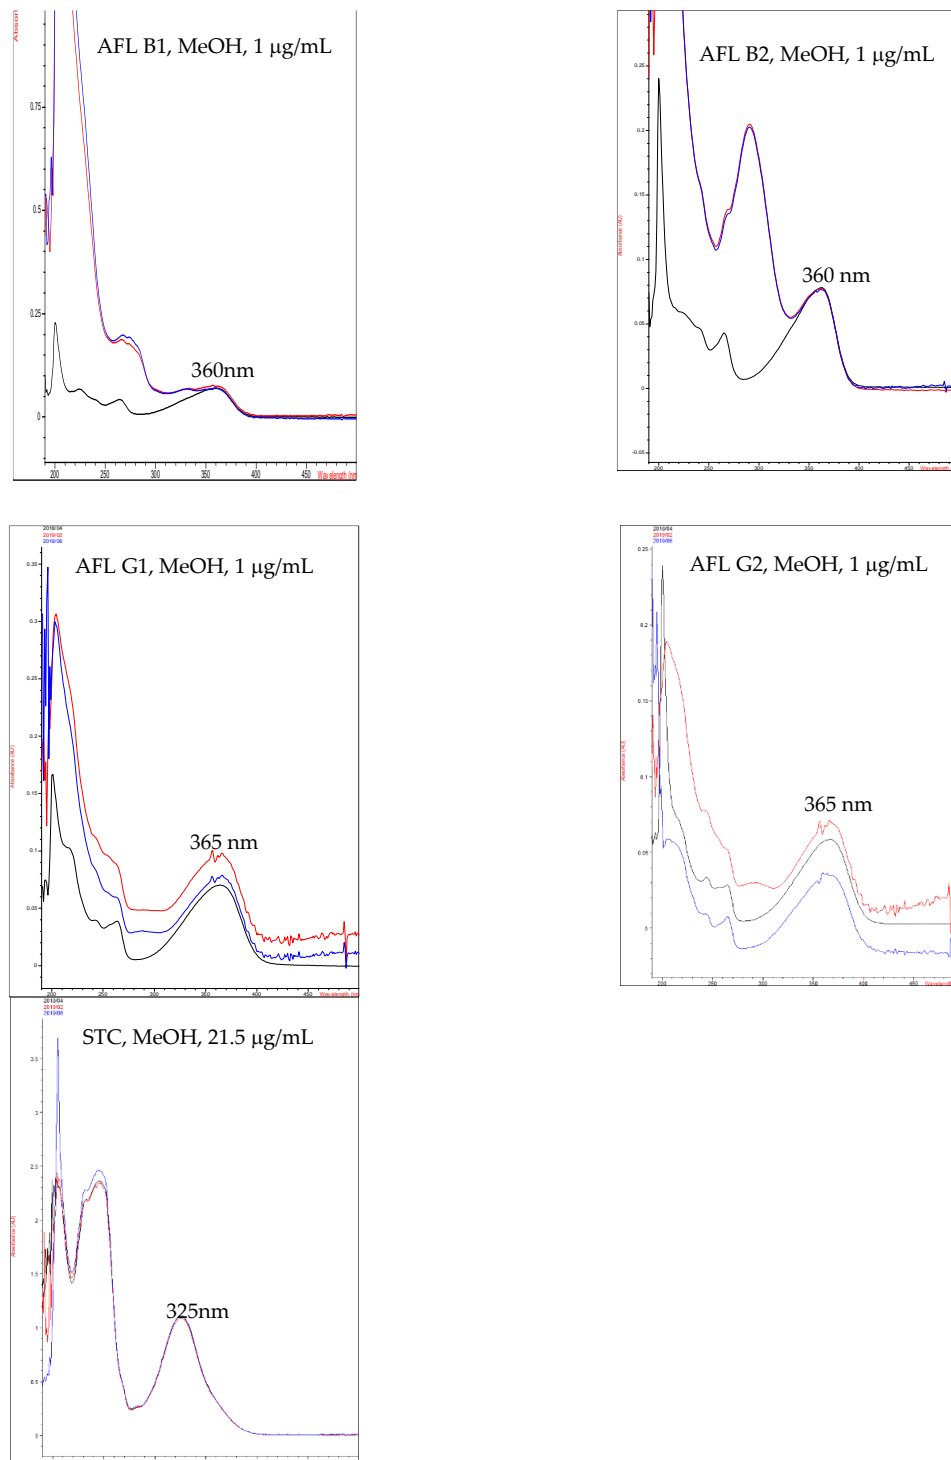

**Figure 1.** UV spectra of aflatoxins and sterigmatocystin individual standard solutions, recorded immediately after preparation (black line), after 10 (red line) and 14 (blue line) months of storage at  $-18^{\circ}\text{C}$ .

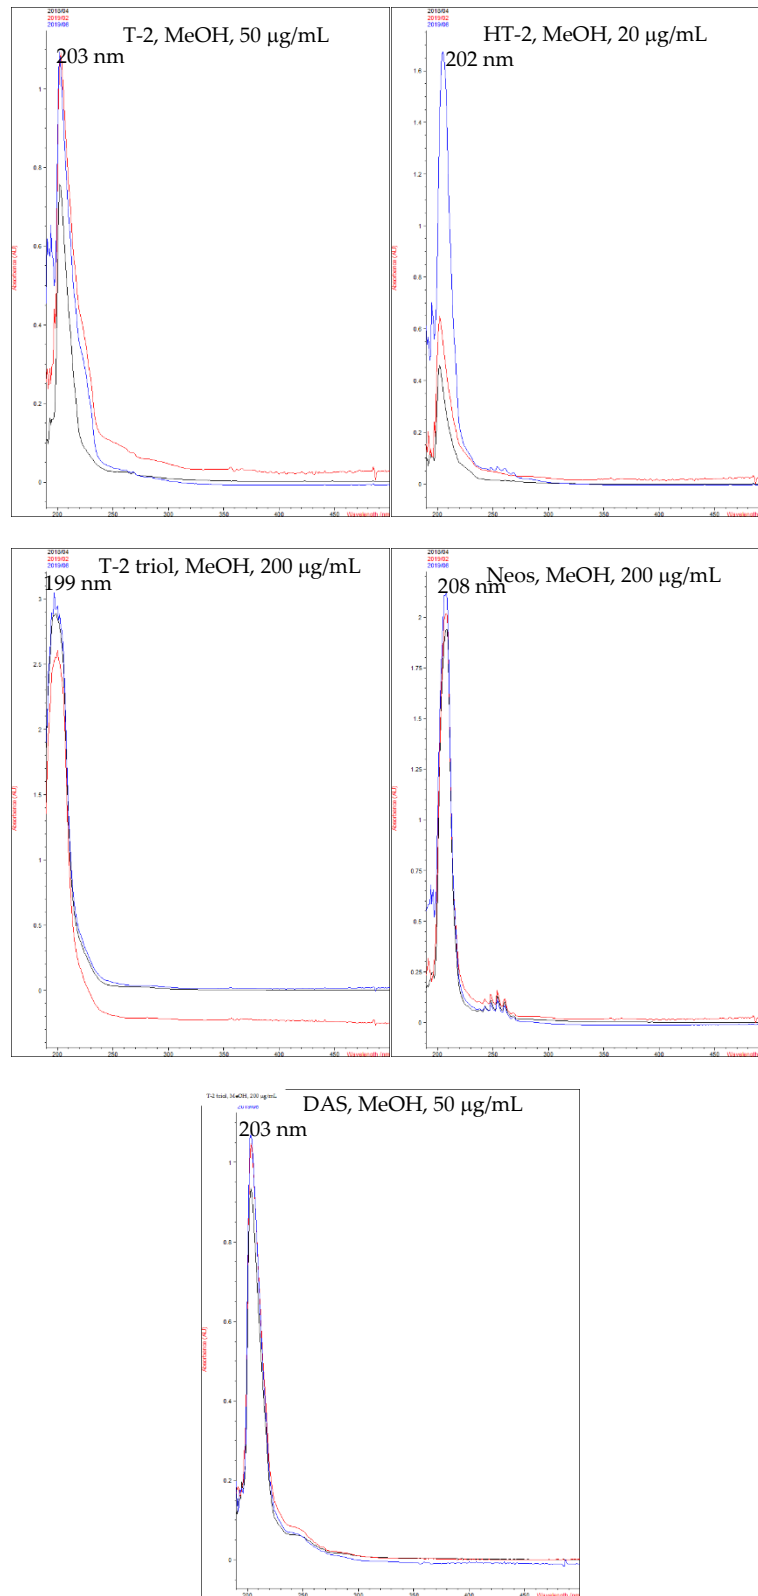

**Figure 2.** UV spectra of A-type trichothecenes individual standard solutions, recorded immediately after preparation (black line), after 10 (red line) and 14 (blue line) months of storage at -18°C.

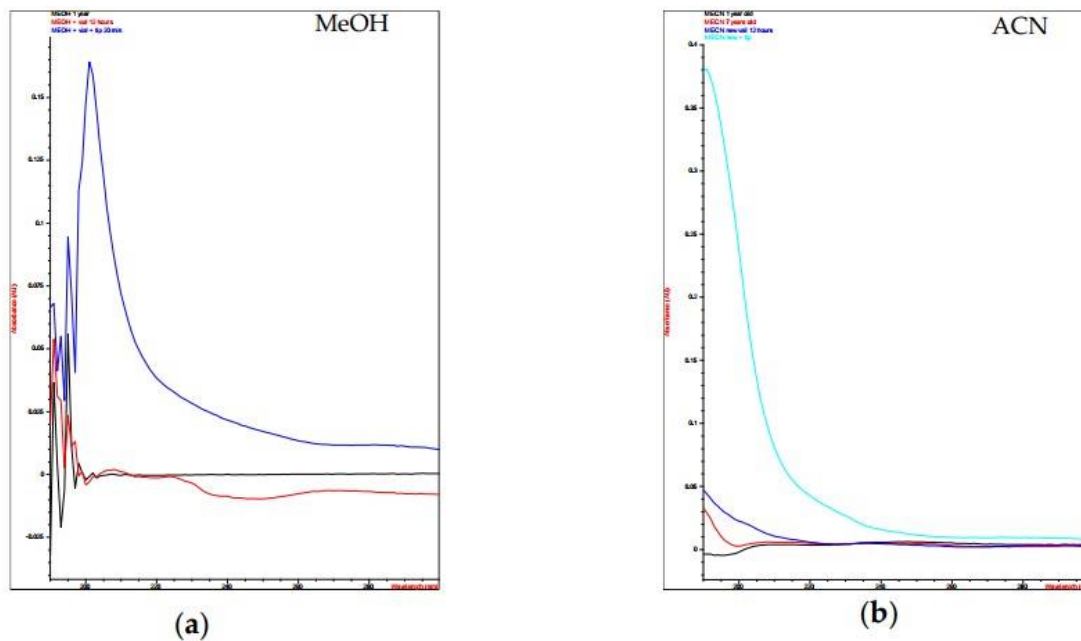

**Figure 3.** UV spectra of methanol (a): 1 year old solvent from the bottle (black line), the same solvent that has been stored in the vial for standard preparation for 12 hours (red line), methanol, in which pipette tip has been soaked for 20 minutes (blue line); UV spectra of acetonitrile (b): 1 year old solvent from the bottle (blue line); 7 years old solvent from the bottle (red line), 1 year old solvent that has been stored in the vial for standard preparation for 12 hours (blue line); acetonitrile, in which pipette tip has been soaked for 20 minutes (light-blue line).

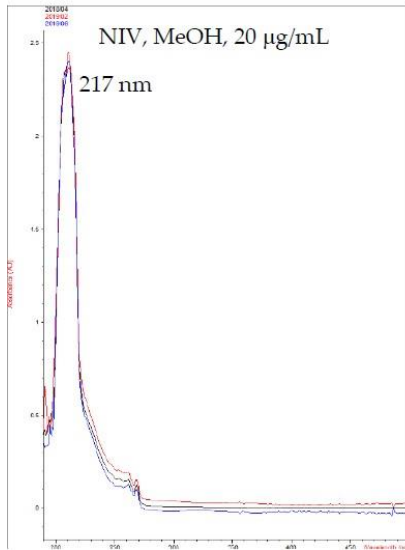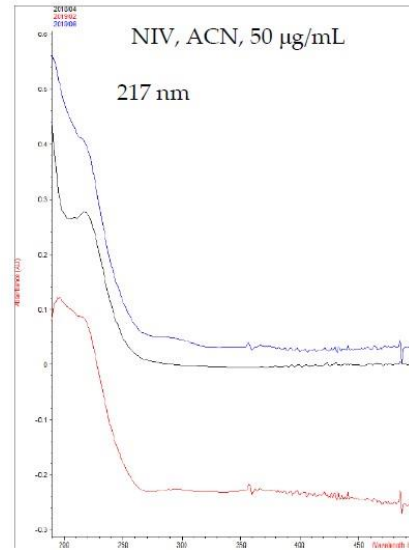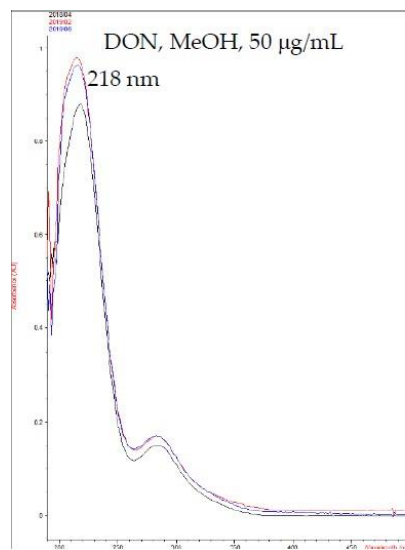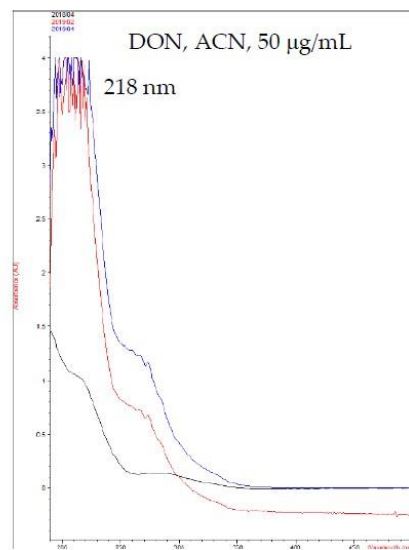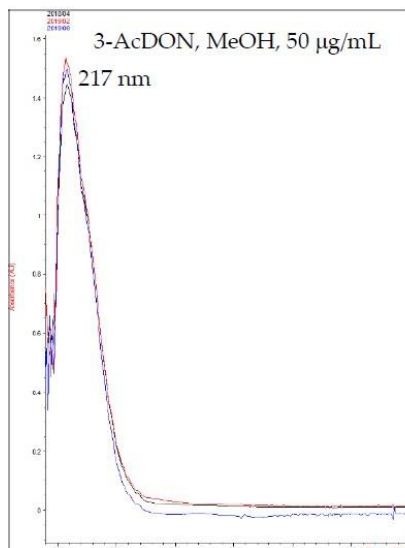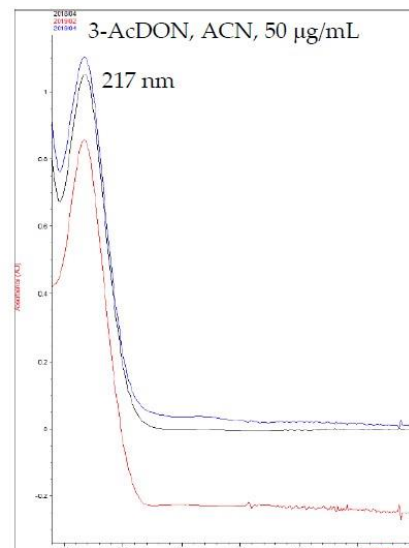

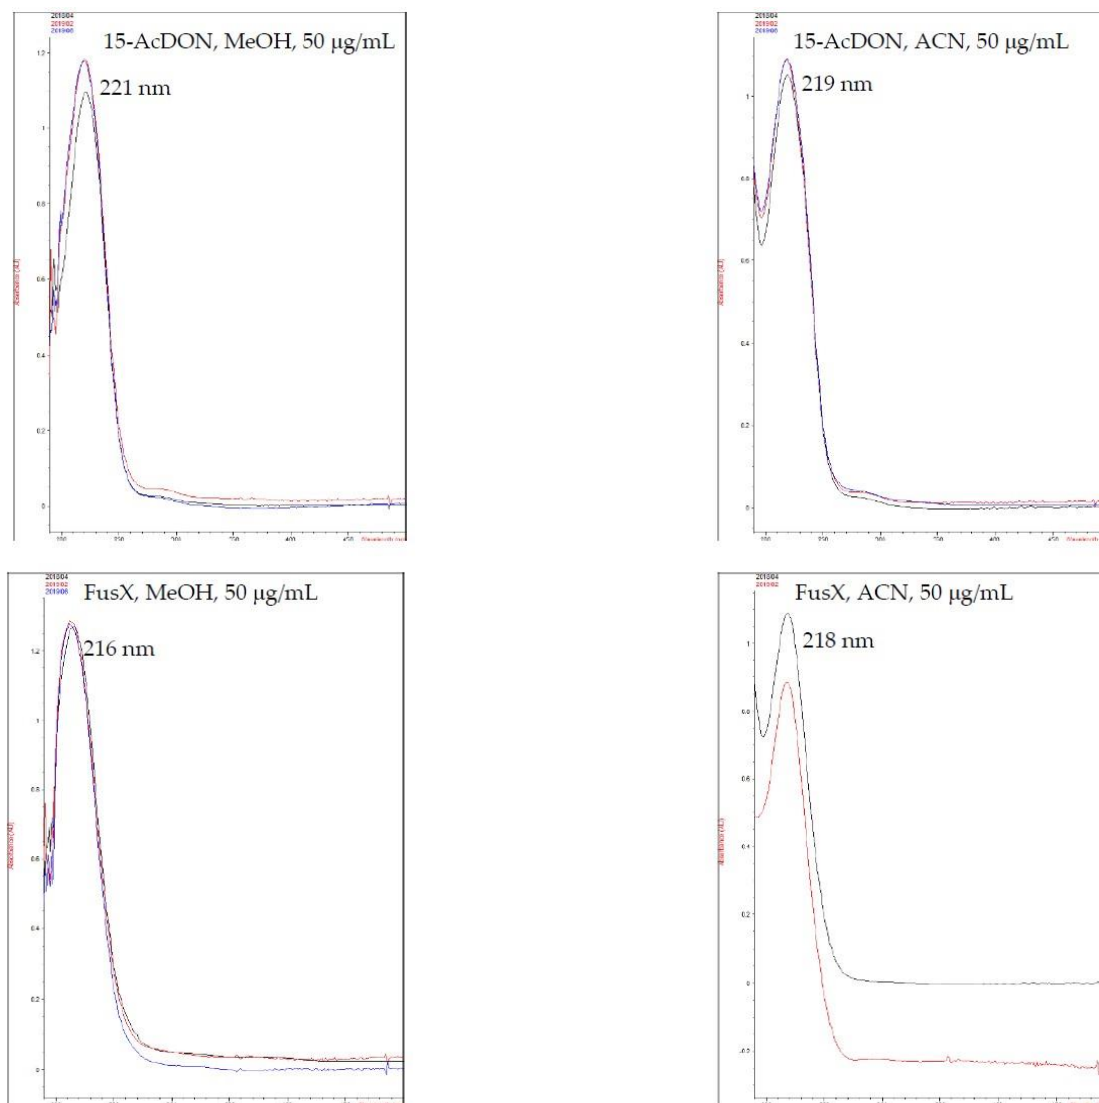

**Figure 4.** UV spectra of B-type trichothecenes individual standard solutions, recorded immediately after preparation (black line), after 10 (red line) and 14 (blue line) months of storage at -18°C.

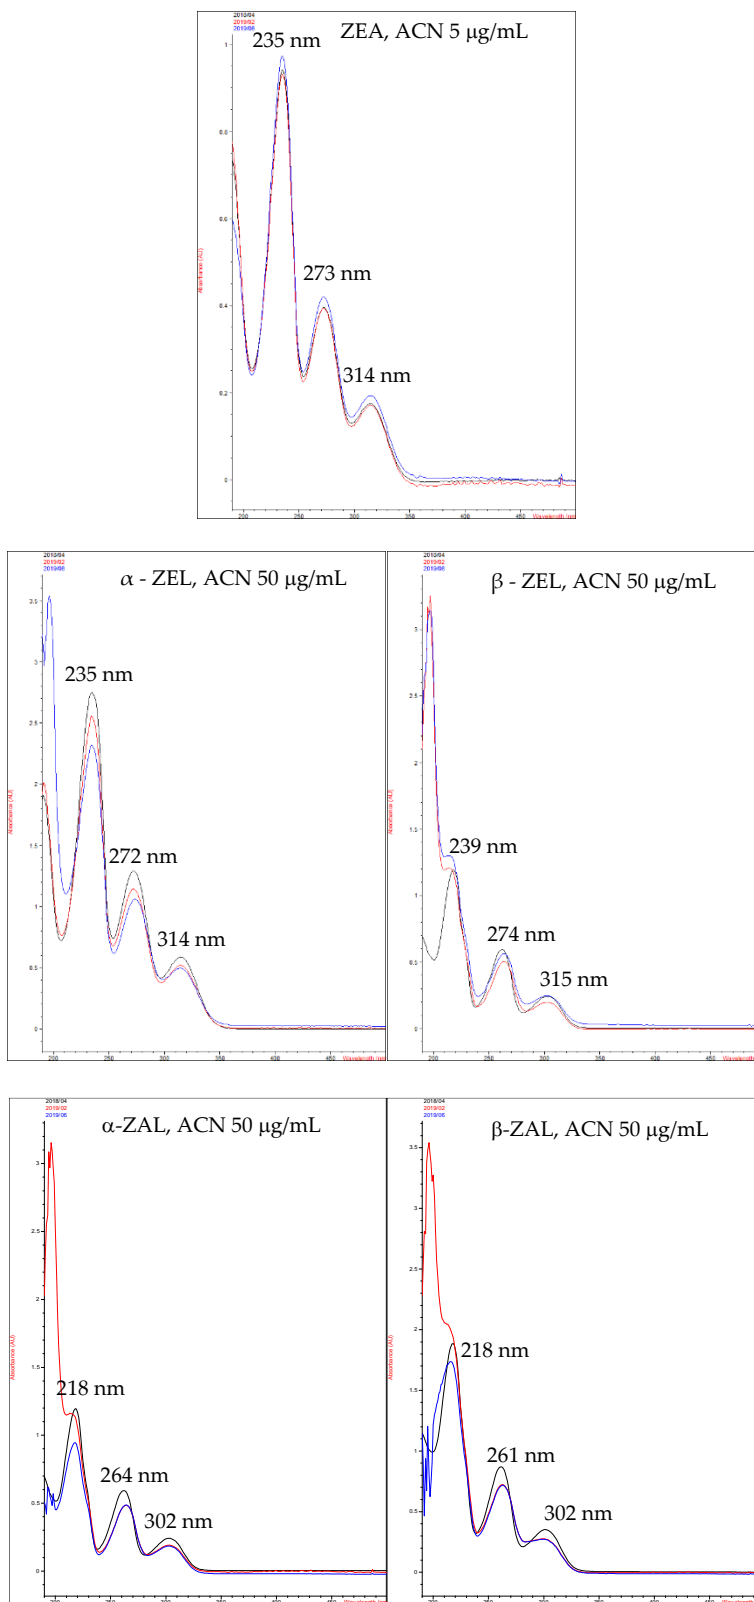

**Figure 5.** Spectra of ZEA and its derivatives in acetonitrile, recorded immediately after preparation (black line), after 10 (red line) and 14 (blue line) months of storage at -18°C.

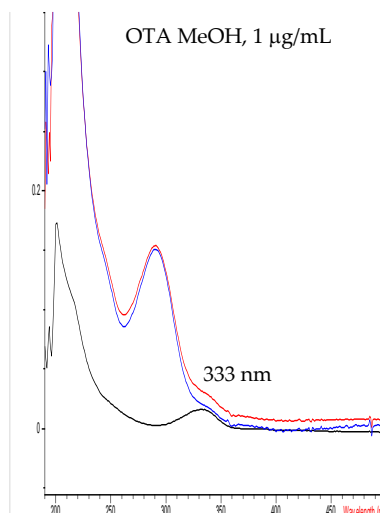

**Figure 6.** Spectra of OTA methanol individual standard solution, recorded immediately after preparation (black line), after 10 (red line) and 14 (blue line) months of storage at  $-18^{\circ}\text{C}$ .

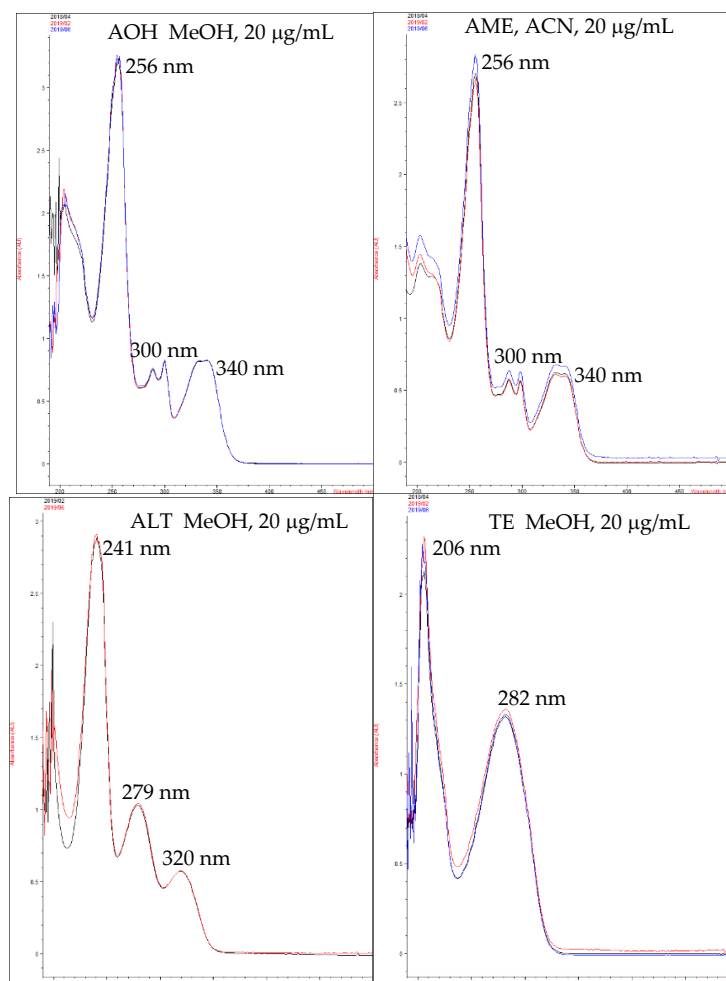

**Figure 7.** Spectra of *Alternaria* mycotoxins individual standard solutions, recorded immediately after preparation (black line), after 10 (red line) and 14 (blue line) months (AOH, AME, TE); after preparation (black line) and four (red line) months (ALT) of storage at  $-18^{\circ}\text{C}$ .

*nniatins A and B, beauvericin*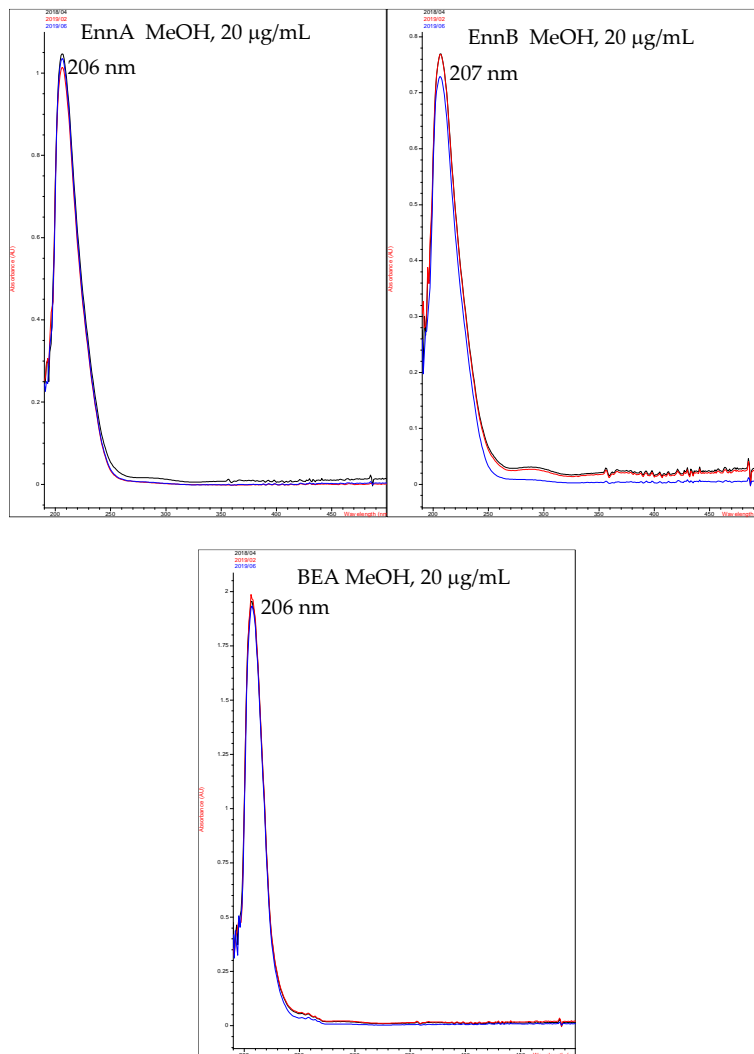

**Figure 8.** Spectra of EnnA, EnnB and BEA methanol individual standard solution, recorded immediately after preparation (black line), after 10 (red line) and 14 (blue line) months of storage at  $-18^{\circ}\text{C}$ .



*Moniliformin, mycophenolic acid, citrinin, citreoviridin, cyclopyrazonic acid*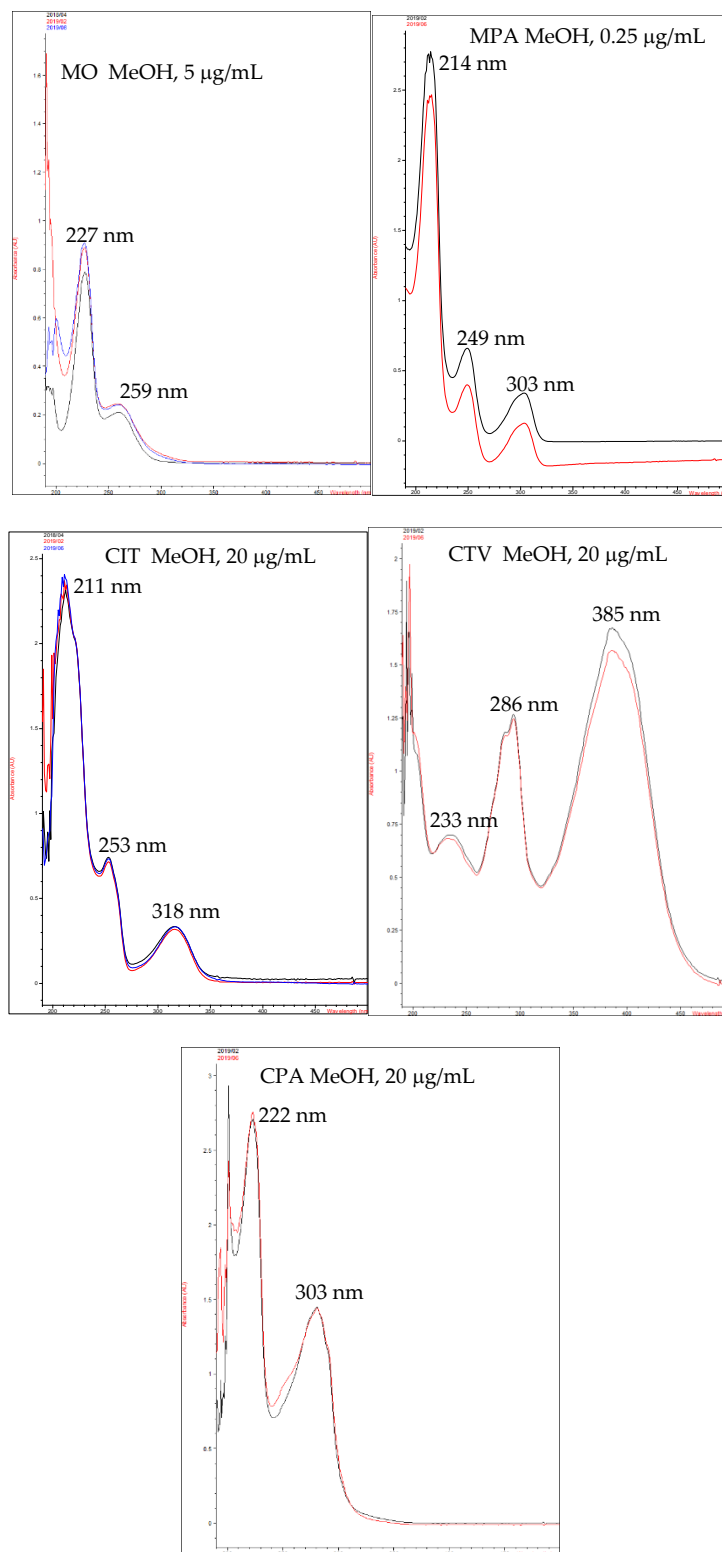

**Figure 9.** Spectra of mycotoxins individual standard solutions, recorded immediately after preparation (black line), after 10 (red line) and 14 (blue line) months (MO, CIT); after preparation (black line) and four (red line) months (MPA, CTA, CTV) of storage at -18°C.

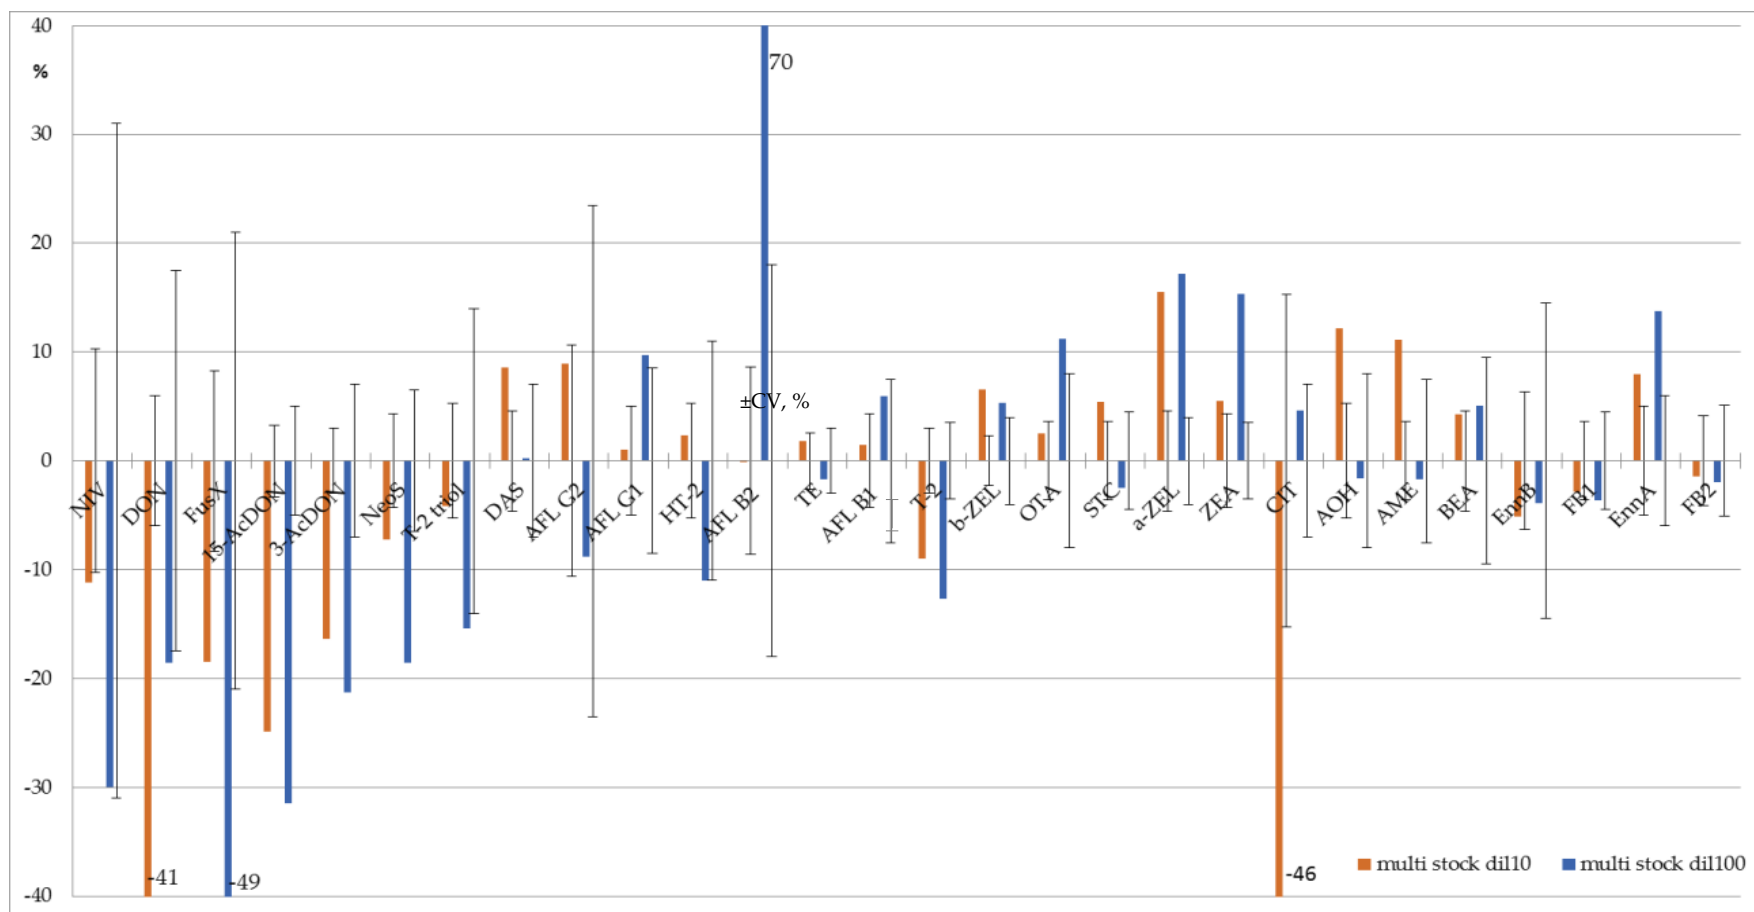

**Figure 10.** Suppression/enhancement of MS/MS analytical signal within 75 hours of stability monitoring of multi-mycotoxin stock standard solution diluted 10- and 100-fold (brown and blue correspondingly). Error bars indicate average coefficient of variation of analytical signal of mycotoxin in 10- and 100-fold diluted multi-analyte standard solution. Mycotoxins are presented in their elution order.

Table 1. SRM table for studied mycotoxins.

| Compound      | Retention Time, min | $\Delta$ RT, min | Polarity | Precursor (m/z) | Product (m/z) | Collision Energy, V | RF Lens, V |
|---------------|---------------------|------------------|----------|-----------------|---------------|---------------------|------------|
| NIV_1         | 1.2                 | 1                | Negative | 357.382         | 281.111       | 10.25               | 86         |
| DON_1         | 1.7                 | 1                | Positive | 297.083         | 159.111       | 31.44               | 100        |
| DON_2_Q       | 1.7                 | 1                | Positive | 297.083         | 249.111       | 10.61               | 100        |
| DON_3         | 1.7                 | 1                | Positive | 297.083         | 267.111       | 17.89               | 100        |
| FusX_1        | 2.2                 | 2                | Positive | 355.402         | 175.04        | 20.42               | 103        |
| FusX_2        | 2.2                 | 2                | Positive | 355.402         | 229.111       | 16.02               | 103        |
| FusX_3_Q      | 2.2                 | 2                | Positive | 355.402         | 247.04        | 12.33               | 103        |
| 15AcDON_1_Q   | 3.5                 | 3                | Positive | 339.144         | 137.11        | 10                  | 97         |
| 15AcDON_2     | 3.5                 | 3                | Positive | 339.144         | 231.125       | 12.88               | 97         |
| 15AcDON_3     | 3.5                 | 3                | Positive | 339.144         | 261.097       | 10.25               | 97         |
| 3AcDON_1_Q    | 3.8                 | 3                | Positive | 339.144         | 203.04        | 17.08               | 97         |
| 3AcDON_2      | 3.8                 | 3                | Positive | 339.144         | 213.111       | 17.63               | 97         |
| 3AcDON_3      | 3.8                 | 3                | Positive | 339.144         | 231.125       | 12.68               | 97         |
| NeoS_1        | 5.5                 | 2                | Positive | 400.197         | 197.169       | 16.72               | 79         |
| NeoS_2        | 5.5                 | 2                | Positive | 400.197         | 203.097       | 17.18               | 79         |
| NeoS_3_Q      | 5.5                 | 2                | Positive | 400.197         | 215.097       | 16.62               | 79         |
| T-2 Triol_1   | 5.5                 | 2                | Positive | 400.233         | 145.183       | 25                  | 76         |
| T-2 Triol_2_Q | 5.5                 | 2                | Positive | 400.233         | 263.097       | 13                  | 76         |
| T-2 Triol_3   | 5.5                 | 2                | Positive | 400.233         | 365.222       | 10                  | 76         |
| DAS_1         | 6.0                 | 2                | Positive | 384.202         | 229.11        | 15                  | 89         |
| DAS_2         | 6.0                 | 2                | Positive | 384.202         | 247.11        | 14                  | 89         |
| DAS_3_Q       | 6.0                 | 2                | Positive | 384.202         | 307.151       | 10.25               | 89         |
| AflaG2_1      | 6.5                 | 2                | Positive | 331.081         | 189.111       | 41.4                | 170        |
| AflaG2_2_Q    | 6.5                 | 2                | Positive | 331.081         | 245.111       | 29.67               | 170        |
| AflaG2_3      | 6.5                 | 2                | Positive | 331.081         | 285.111       | 27.29               | 170        |
| AflaG1_1      | 7.1                 | 2                | Positive | 329.066         | 199.986       | 40.59               | 150        |
| AflaG1_2_Q    | 7.1                 | 2                | Positive | 329.066         | 243.04        | 26.08               | 150        |
| AflaG1_3      | 7.1                 | 2                | Positive | 329.066         | 311.04        | 21.02               | 150        |
| HT-2_Na_1     | 7.4                 | 2                | Positive | 447.375         | 284.923       | 20                  | 163        |
| HT-2_Na_2_Q   | 7.4                 | 2                | Positive | 447.375         | 345.375       | 17                  | 163        |
| AflaB2_1      | 7.5                 | 2                | Positive | 315.086         | 243.04        | 39.38               | 170        |
| AflaB2_2_Q    | 7.5                 | 2                | Positive | 315.086         | 259.04        | 29.01               | 170        |
| AflaB2_3      | 7.5                 | 2                | Positive | 315.086         | 287.111       | 25.62               | 170        |
| TE_1          | 7.7                 | 2                | Positive | 415.284         | 256.222       | 29.37               | 129        |
| TE_2          | 7.7                 | 2                | Positive | 415.284         | 302.169       | 13.13               | 129        |
| TE_3_Q        | 7.7                 | 2                | Positive | 415.284         | 312.151       | 19.3                | 129        |
| AflaB1_1      | 8.0                 | 2                | Positive | 313.071         | 213.04        | 44.58               | 166        |
| AflaB1_2      | 8.0                 | 2                | Positive | 313.071         | 241.04        | 37.25               | 166        |
| AflaB1_3_Q    | 8.0                 | 2                | Positive | 313.071         | 285.111       | 22.44               | 166        |
| T-2_Na_1      | 9.3                 | 2                | Positive | 489.138         | 244.954       | 23                  | 138        |

|            |      |   |          |         |         |       |     |
|------------|------|---|----------|---------|---------|-------|-----|
| T-2_Na_2_Q | 9.3  | 2 | Positive | 489.138 | 326.887 | 23    | 138 |
| T-2_Na_3   | 9.3  | 2 | Positive | 489.138 | 387.375 | 20.5  | 138 |
| CTV_3      | 9.5  | 2 | Positive | 403.2   | 285     | 10    | 45  |
| CTV_2_Q    | 9.5  | 2 | Positive | 403.2   | 297     | 10    | 45  |
| CTV_1      | 9.5  | 2 | Positive | 403.2   | 315     | 10    | 45  |
| b-ZEL_1    | 10.3 | 4 | Positive | 321.32  | 189.1   | 20    | 88  |
| b-ZEL_2_Q  | 10.3 | 4 | Positive | 321.32  | 285.1   | 10    | 88  |
| b-ZEL_3    | 10.3 | 4 | Positive | 321.32  | 303.1   | 10    | 88  |
| OTA_1      | 11.0 | 2 | Positive | 404.09  | 221     | 34.72 | 123 |
| OTA_2_Q    | 11.0 | 2 | Positive | 404.09  | 239     | 23.5  | 123 |
| OTA_3      | 11.0 | 2 | Positive | 404.09  | 358.111 | 14.04 | 123 |
| STC_1      | 11.8 | 2 | Positive | 325.071 | 253.04  | 43.67 | 152 |
| STC_2_Q    | 11.8 | 2 | Positive | 325.071 | 281.04  | 36.24 | 152 |
| STC_3      | 11.8 | 2 | Positive | 325.071 | 310.058 | 24.01 | 152 |
| a-ZEL_1    | 12.1 | 4 | Positive | 321.12  | 177.11  | 19    | 65  |
| a-ZEL_2_Q  | 12.1 | 4 | Positive | 321.12  | 285.11  | 10    | 65  |
| a-ZEL_3    | 12.1 | 4 | Positive | 321.12  | 303.22  | 11    | 65  |
| ZEA_1      | 12.1 | 2 | Positive | 319.2   | 185     | 15    | 90  |
| ZEA_2_Q    | 12.1 | 2 | Positive | 319.2   | 283.1   | 10    | 90  |
| ZEA_3      | 12.1 | 2 | Positive | 319.2   | 301.2   | 10    | 90  |
| CIT_1      | 12.2 | 4 | Positive | 251.154 | 115.151 | 52.32 | 93  |
| CIT_2_Q    | 12.2 | 4 | Positive | 251.154 | 191.111 | 25.47 | 93  |
| CIT_3      | 12.2 | 4 | Positive | 251.154 | 205.111 | 26.53 | 93  |
| AOH_1      | 12.8 | 2 | Positive | 259.322 | 128.125 | 44    | 100 |
| AOH_2_Q    | 12.8 | 2 | Positive | 259.322 | 185.097 | 31    | 100 |
| AOH_3      | 12.8 | 2 | Positive | 259.322 | 213.054 | 27    | 100 |
| AME_1      | 14.2 | 2 | Positive | 273.1   | 128.1   | 60    | 150 |
| AME_2      | 14.2 | 2 | Positive | 273.1   | 185.1   | 40    | 150 |
| AME_3_Q    | 14.2 | 2 | Positive | 273.1   | 230     | 30    | 150 |
| BEA_1      | 15.0 | 4 | Positive | 801.44  | 134.222 | 54    | 215 |
| BEA_2      | 15.0 | 4 | Positive | 801.44  | 244.22  | 32    | 215 |
| BEA_3      | 15.0 | 4 | Positive | 801.44  | 262.22  | 30    | 215 |
| EnnB_1_Q   | 15.1 | 2 | Positive | 657.58  | 214.22  | 31    | 142 |
| EnnB_2     | 15.1 | 2 | Positive | 657.58  | 527.4   | 27    | 142 |
| EnnB_3     | 15.1 | 2 | Positive | 657.58  | 640.556 | 17    | 142 |
| FB1_1_Q    | 15.3 | 2 | Positive | 722.484 | 334.333 | 39.98 | 217 |
| FB1_2      | 15.3 | 2 | Positive | 722.484 | 352.405 | 35.79 | 217 |
| FB1_3      | 15.3 | 2 | Positive | 722.484 | 704.502 | 27.85 | 217 |
| EnnA_1_Q   | 16.0 | 2 | Positive | 682.664 | 210.222 | 24    | 255 |
| EnnA_2     | 16.0 | 2 | Positive | 682.664 | 228.22  | 24    | 255 |
| EnnA_3     | 16.0 | 2 | Positive | 682.664 | 229.11  | 21    | 255 |
| FB2_1      | 19.0 | 2 | Positive | 706.488 | 318.405 | 36.49 | 150 |

|         |      |   |          |         |         |       |     |
|---------|------|---|----------|---------|---------|-------|-----|
| FB2_2_Q | 19.0 | 2 | Positive | 706.488 | 336.405 | 35.74 | 150 |
| FB2_3   | 19.0 | 2 | Positive | 706.488 | 354.405 | 33.66 | 150 |

---

**Table 2.** Suppression/enhancement of MS/MS analytical signal (SSE) within 75 hours of stability monitoring of multi-mycotoxin stock standard solution diluted 10- and 100-fold (SSE (dil10) and SSE(dil100) correspondingly) and average coefficients of variation of analytical signal of mycotoxin in 10- and 100-fold diluted multi-analyte standard solution (CVaver (dil10) and CVaver(dil100) correspondingly).

| MT        | SSE(dil10) | CVaver(dil10) | SSE(dil100) | CVaver(dil100) |
|-----------|------------|---------------|-------------|----------------|
| NIV       | -11,2      | 10,3          | -30         | 31             |
| DON       | -41,0      | 6             | -18,6       | 17,5           |
| FusX      | -18,5      | 8,3           | -48,5       | 21             |
| 15-AcDON  | -24,9      | 3,3           | -31,5       | 5              |
| 3-AcDON   | -16,4      | 3             | -21,3       | 7              |
| NeoS      | -7,2       | 4,3           | -18,6       | 6,5            |
| T-2 triol | -4,2       | 5,3           | -15,4       | 14             |
| DAS       | 8,6        | 4,6           | 0,2         | 7              |
| AFL G2    | 8,9        | 10,6          | -8,8        | 23,5           |
| AFL G1    | 1          | 5             | 9,7         | 8,5            |
| HT-2      | 2,3        | 5,3           | -11         | 11             |
| AFL B2    | -0,1       | 8,6           | 70          | 18             |
| TE        | 1,8        | 2,6           | -1,7        | 3              |
| AFL B1    | 1,5        | 4,3           | 5,9         | 7,5            |
| T-2       | -9         | 3             | -12,7       | 3,5            |
| b-ZEL     | 6,6        | 2,3           | 5,3         | 4              |
| OTA       | 2,5        | 3,6           | 11,2        | 8              |
| STC       | 5,4        | 3,6           | -2,5        | 4,5            |
| a-ZEL     | 15,5       | 4,6           | 17,2        | 4              |
| ZEA       | 5,5        | 4,3           | 15,3        | 3,5            |
| CIT       | -46,3      | 15,3          | 4,6         | 7              |
| AOH       | 12,2       | 5,3           | -1,6        | 8              |
| AME       | 11,1       | 3,6           | -1,7        | 7,5            |
| BEA       | 4,3        | 4,6           | 5,1         | 9,5            |
| EnnB      | -5,1       | 6,3           | -3,9        | 14,5           |
| FB1       | -2,8       | 3,6           | -3,6        | 4,5            |
| EnnA      | 8          | 5             | 13,8        | 6              |
| FB2       | -1,4       | 4,1           | -2          | 5,1            |
